# Supplementary material for: Zbtb11 interacts with Otx2 and patterns the anterior neuroectoderm in Xenopus
Source: PubMed Central journal article supplement (PMC11290676; doi:10.1371/journal.pone.0293852), 2024-07-31
Supplement: pone.0293852.s001.pdf [file pone.0293852.s001.pdf]

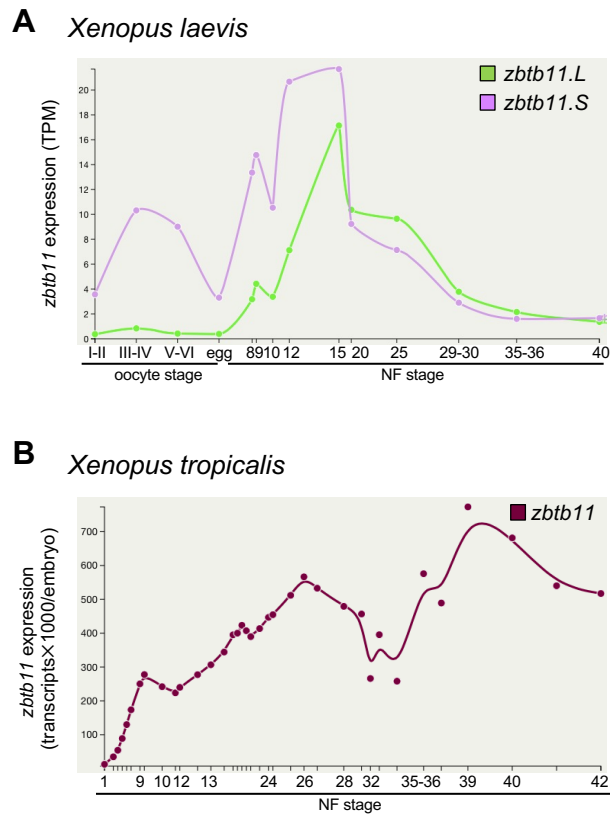

**S1 Fig. Developmental expression of *zbtb11* in *Xenopus laevis* and *Xenopus tropicalis*.**

(A) Temporal expression of *zbtb11.L* and *zbtb11.S* in *X. laevis* embryos. Expression levels (transcripts per million: TPM) are calculated from RNA-sequencing (RNA-seq) datasets of *X. laevis* developing embryos (Session et al., 2016). (B) Temporal expression of *zbtb11* in *X. tropicalis* embryos. Expression levels (transcripts × 1000 ) are calculated from RNA-seq datasets of *X. tropicalis* developing embryos (Owens et al., 2016). Images are generated using Xenbase (<http://www.xenbase.org/>) and developmental stages (oocyte and Nieuwkoop-Faber [NF] stages) are as indicated (A,B).
