# Supplementary material for: Zbtb11 interacts with Otx2 and patterns the anterior neuroectoderm in Xenopus
Source: PubMed Central journal article supplement (PMC11290676; doi:10.1371/journal.pone.0293852), 2024-07-31
Supplement: pone.0293852.s002.pdf [file pone.0293852.s002.pdf]

**S2 Fig. Alignment of Zbtb11 amino acid sequences between different species.**

Alignment of Zbtb11 amino acid sequences between *Xenopus laevis* (Xl), *Xenopus tropicalis* (Xt), *Homo sapiens* (Hs), *Mus musculus* (Mm), and *Danio rerio* (Dr). *Xenopus laevis* has two homeologs: L and S genes. Light blue boxes, the conserved regions CR1, CR2 and CR3; purple box, the integrase-like histidine-histidine-cysteine-cysteine (HHCC) motif; brown box, the BTB domain; magenta boxes, C2H2 type zinc fingers. The blue-coloured cysteine residue (C116) indicates a mutation site in the neutrophil-deficient zebrafish mutant (marsanne, mne). Red histidine residues (H729 and H880) indicate ZBTB11 mutation sites that are associated with intellectual disability. Arrows indicate the end of the Venus-BTB construct, and the beginning of the Venus-Znf construct.
