# Supplementary material for: Zbtb11 interacts with Otx2 and patterns the anterior neuroectoderm in Xenopus
Source: PubMed Central journal article supplement (PMC11290676; doi:10.1371/journal.pone.0293852), 2024-07-31
Supplement: pone.0293852.s006.pdf [file pone.0293852.s006.pdf]

A

Fig 7A

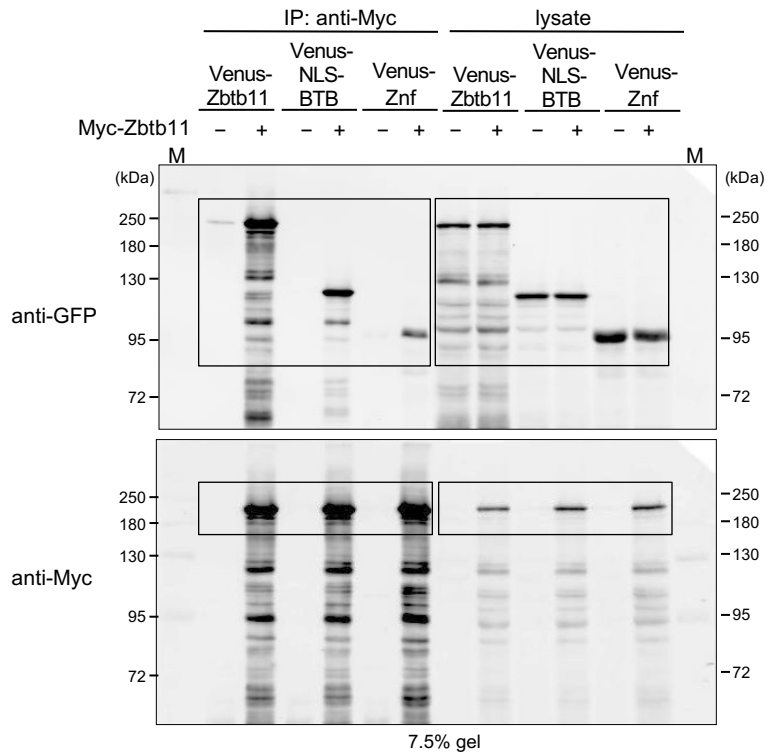

Fig 7B

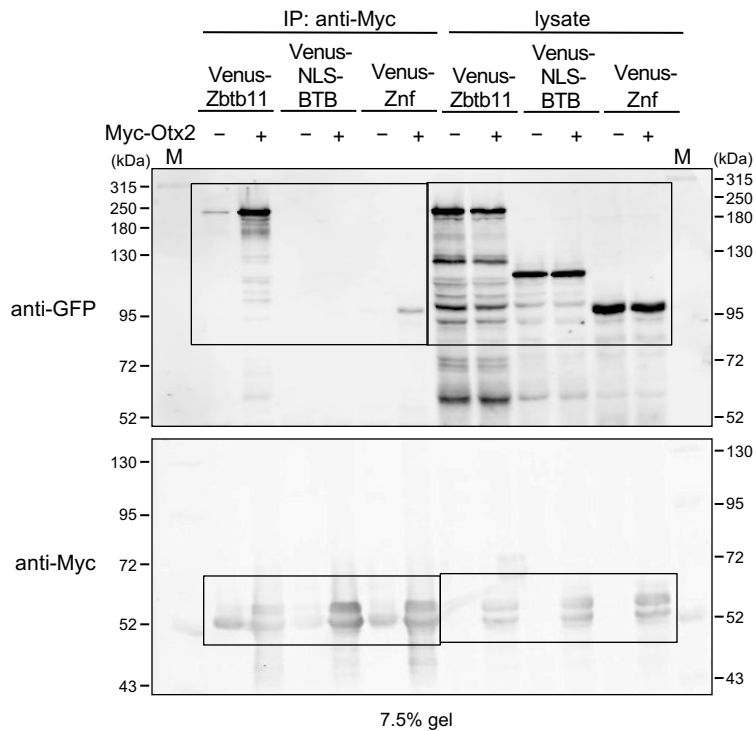

A (continued)

Fig 7C

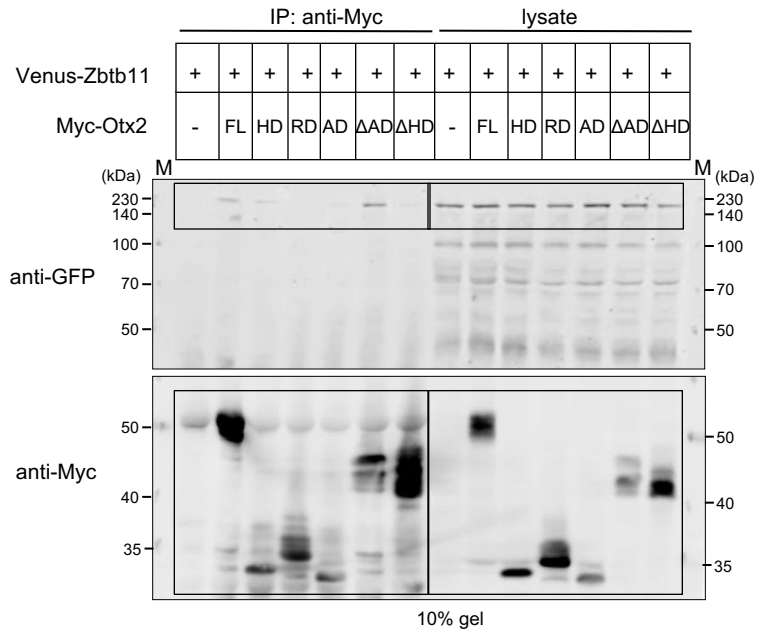

**B****Fig 8A**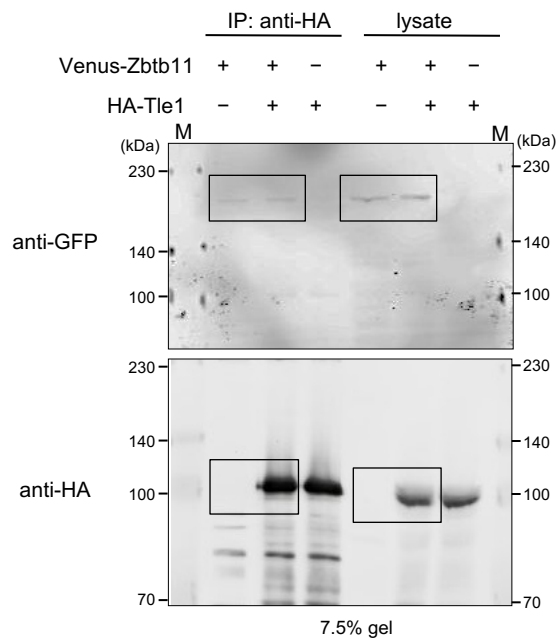**Fig 8B**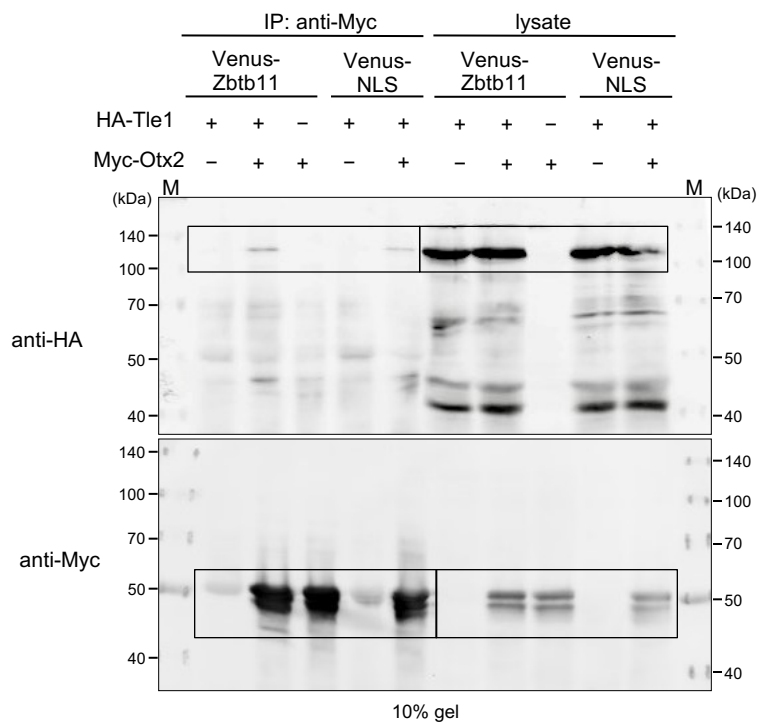

C

Fig 9B

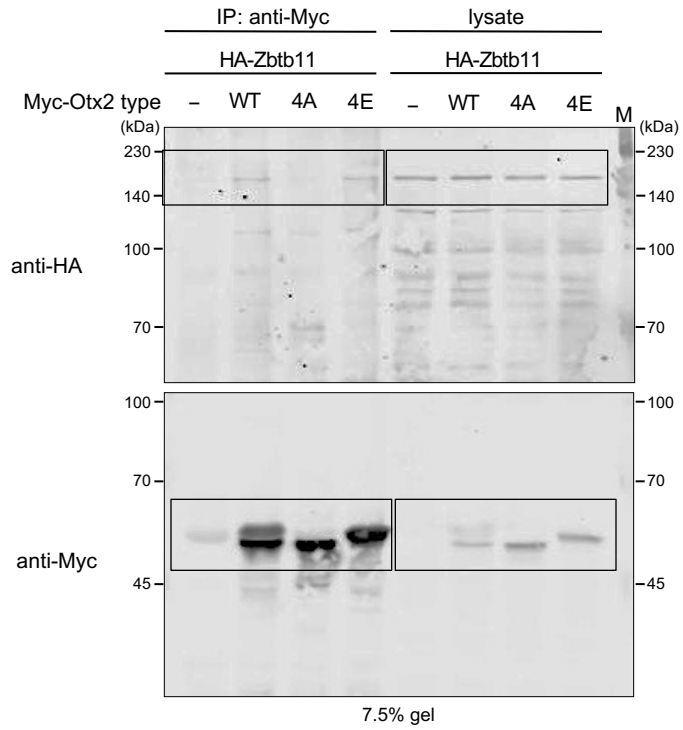

D

S3A Fig

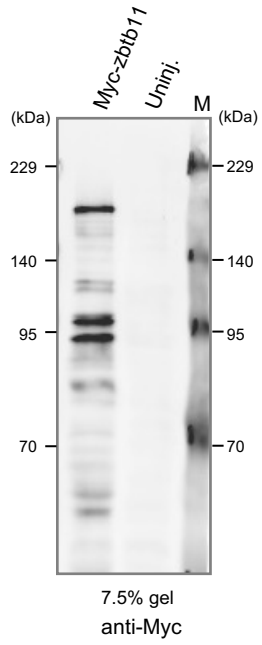

S3B Fig

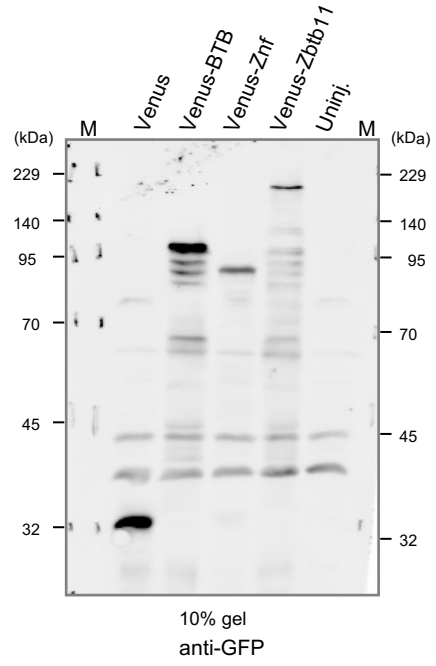

E

### S4B Fig

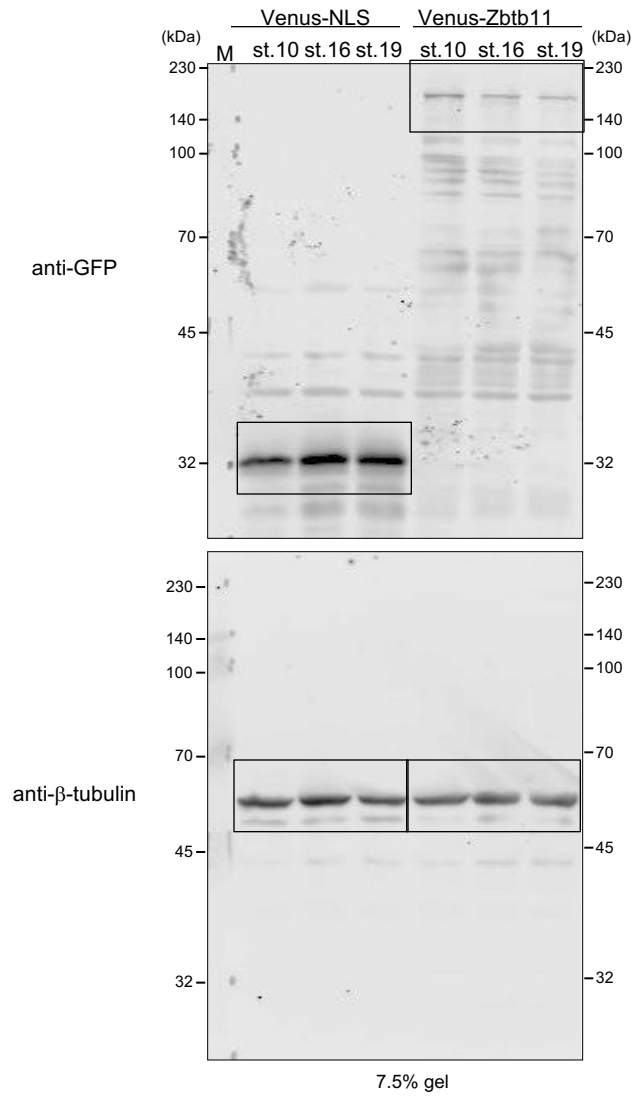

F

## S5 Fig

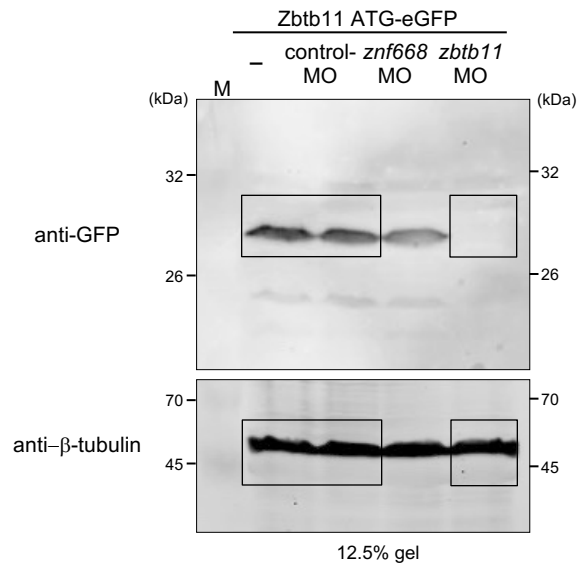

### S6 Fig. Original, uncropped and minimally adjusted images of western blots.

Original images for (A) Fig 7A-C, (B) Fig 8A and 8B, (C) Fig 9B, (D) S3 Fig, (E) S4B Fig, and (F) S5 Fig are shown. See the corresponding figure legends for details. Boxes indicate the cropped images presented in the figures. M, protein size markers. Molecular masses (kDa) of the protein size markers are as indicated.
