# Supplementary material for: Zbtb11 interacts with Otx2 and patterns the anterior neuroectoderm in Xenopus
Source: PubMed Central journal article supplement (PMC11290676; doi:10.1371/journal.pone.0293852), 2024-07-31
Supplement: pone.0293852.s007.pdf [file pone.0293852.s007.pdf]

**S1 Table. The list of plasmid constructs.**

| Plasmid names             | Cloning sites                | Vectors                | Comments                                                             |
|---------------------------|------------------------------|------------------------|----------------------------------------------------------------------|
| pCSf107_Zbtb11_T          | <i>Bam</i> HI, <i>Xba</i> I  | pCSf107_mT             | aa 1-1118 (full length); Zbtb11.S ( <i>X. laevis</i> ), XM_018249724 |
| pCSf107_Venus-Zbtb11_T    | <i>Bam</i> HI, <i>Xba</i> I  | pCSf107_Venus_mT       | Replaced pCSf107-Zbtb11_T                                            |
| pCSf107_Venus-BTB_T       | <i>Bam</i> HI, <i>Xba</i> I  | pCSf107_Venus_mT       | aa 1-580                                                             |
| pCSf107_Venus-ZF_T        | <i>Bam</i> HI, <i>Xho</i> I  | pCSf107_Venus_mT       | aa 622-1118                                                          |
| pCSf107_Venus-NLS-BTB_T   | <i>Bam</i> HI, <i>Sac</i> II | pCSf107_Venus-NLS_mT   | Replaced pCSf107_Venus-BTB_T                                         |
| pCSf107_Zbtb11-ATG-eGFP_T | <i>Bam</i> HI, <i>Xba</i> I  | pCSf107_mcs2-eGFP-C2mT | <i>zbtb11</i> -MO target sequences ( <i>X. tropicalis</i> )          |
| pCSf107_pax6_T            | <i>Sfu</i> I, <i>Not</i> I   | pCSf107_mT             | Replaced pCS105-pax6                                                 |
| pCSf107_Myc-Zbtb11_T      | <i>Bam</i> HI, <i>Asc</i> I  | pCSf107_MycmT          | Replaced pCSf107-Zbtb11_T                                            |
| pCSf107_HA-Zbtb11_T       | <i>Bam</i> HI, <i>Asc</i> I  | pCSf107_HAmT           | Replaced pCSf107-Zbtb11_T                                            |
| pCSf107_MycOtx2FL_T       | <i>Bam</i> HI, <i>Xba</i> I  | pCSf107_MTmT           | aa 1-288 (full length) Otx2.S ( <i>X. laevis</i> ), NP_001084160     |
| pCSf107_MycOtx2HD_T       | <i>Bam</i> HI, <i>Xba</i> I  | pCSf107_MTmT           | aa 1-96                                                              |
| pCSf107_MycOtx2RD_T       | <i>Bam</i> HI, <i>Xba</i> I  | pCSf107_MTmT           | aa 97-184                                                            |
| pCSf107_MycOtx2AD_T       | <i>Bam</i> HI, <i>Xba</i> I  | pCSf107_MTmT           | aa 185-288                                                           |
| pCSf107_MycOtx2ΔAD_T      | <i>Bam</i> HI, <i>Xba</i> I  | pCSf107_MTmT           | aa 1-184                                                             |
| pCSf107_MycOtx2ΔHD_T      | <i>Bam</i> HI, <i>Xba</i> I  | pCSf107_MTmT           | aa 97-288                                                            |
| pCSf107_HATle1_T          | <i>Age</i> I, <i>Xba</i> I   | pCSf107_4HAmT          | Replaced pCSf107-Tle1                                                |
| pCSf107_Otx2_T            | <i>Bam</i> HI, <i>Xba</i> I  | pCSf107_mT             | Untagged Otx2                                                        |
| pCSf107_MycOtx2-4A_T      | <i>Bam</i> HI, <i>Xba</i> I  | pCSf107_MTmT           | T115A, S116A, S132A, S158A                                           |
| pCSf107_MycOtx2-4E_T      | <i>Bam</i> HI, <i>Xba</i> I  | pCSf107_MTmT           | T115D, S116E, S132E, S158E                                           |
| pCSf107_Otx2-4A_T         | <i>Bam</i> HI, <i>Xba</i> I  | pCSf107_mT             | T115A, S116A, S132A, S158A                                           |
| pCSf107_Otx2-4E_T         | <i>Bam</i> HI, <i>Xba</i> I  | pCSf107_mT             | T115D, S116E, S132E, S158E                                           |

Note: the postfix “\_T” indicates the presence of SP6/T7 terminators at the end of the transcribed region.
