# Supplementary material for: Zbtb11 interacts with Otx2 and patterns the anterior neuroectoderm in Xenopus
Source: PubMed Central journal article supplement (PMC11290676; doi:10.1371/journal.pone.0293852), 2024-07-31
Supplement: pone.0293852.s008.pdf [file pone.0293852.s008.pdf]

**S2 Table. The list of cutting sites and RNA polymerases for the in vitro transcription of anti-sense RNA probe.**

| Gene or plasmid names     | Cutting sites | RNA polymerase |
|---------------------------|---------------|----------------|
| <i>En-2</i>               | <i>Bam</i> HI | T3             |
| pCSf107 <i>Otx2</i> -WT_T | <i>Bam</i> HI | T7             |
| pCS107BSX <i>rax</i>      | <i>Xho</i> I  | SP6            |
| pCSf107 <i>pax6</i> _T    | <i>Sal</i> I  | T7             |
| pBS SK(-) <i>gbx2</i>     | <i>Eco</i> RI | T3             |
| BS4A 3(X <i>pax2</i> -2a) | <i>Eco</i> RI | T3             |
| pBSK <i>xcg1</i>          | <i>Not</i> I  | T3             |
